# Supplementary material for: Cigarette smoke exposure enhances transforming acidic coiled-coil–containing protein 2 turnover and thereby promotes emphysema
Source: JCI journal article supplement (doi:10.1172/jci.insight.125895), 2020-01-29
Supplement: sd1 [file 1]

A.

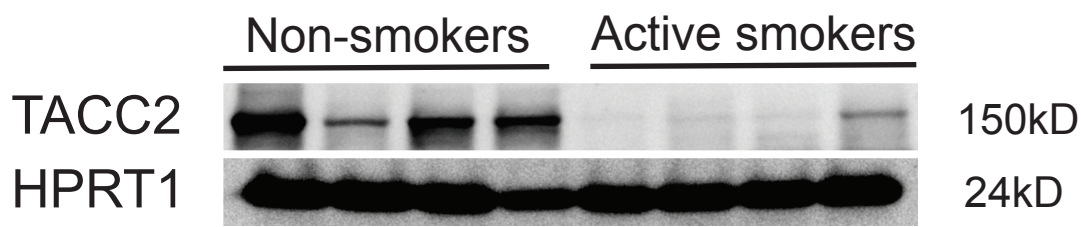

B.

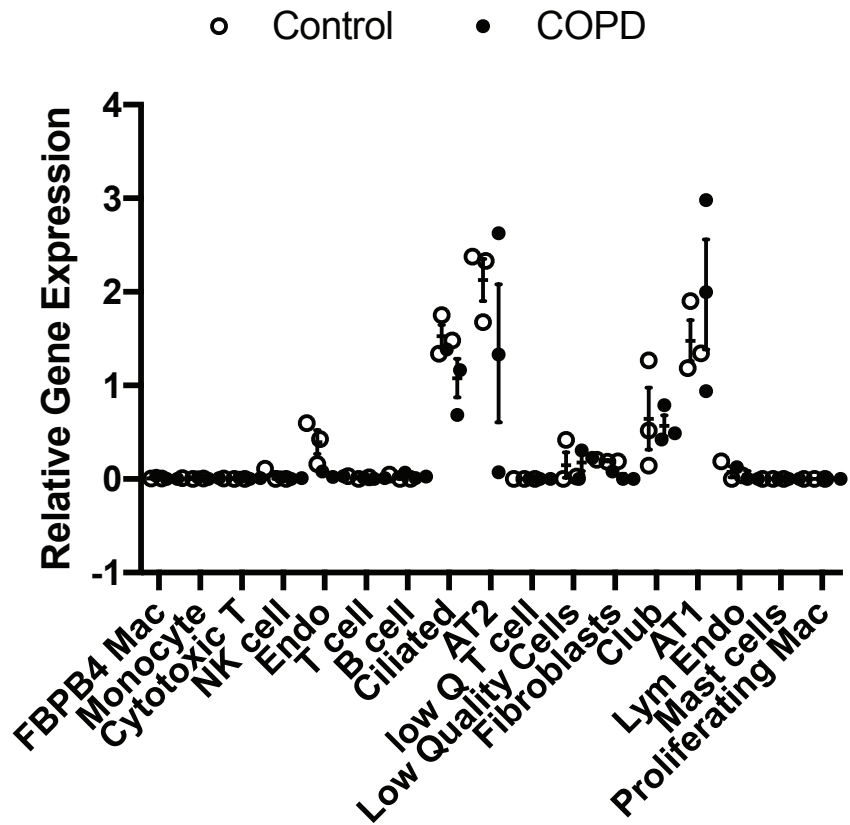

Supplemental Fig. 1

**A.** Whole lung parenchyma lysates were obtained from 4 non-smokers (2 males and 2 females: mean age  $59.8 \pm 8.6$ ) and 4 active smokers (2 males and 2 females: mean age  $61.3 \pm 5.5$ , at least 20 pack-year cigarette smoking) without known lung disease. Immunoblot (IB) analysis was performed for TACC2.

**B.** Single cell RNA sequencing was conducted using lung parenchymal tissues obtained from three normal (18 year-old male, and 23 and 57 year-old females) and severe COPD subjects (61, 62, and 65 year-old females). Data are expressed as mean  $\pm$  SEM.

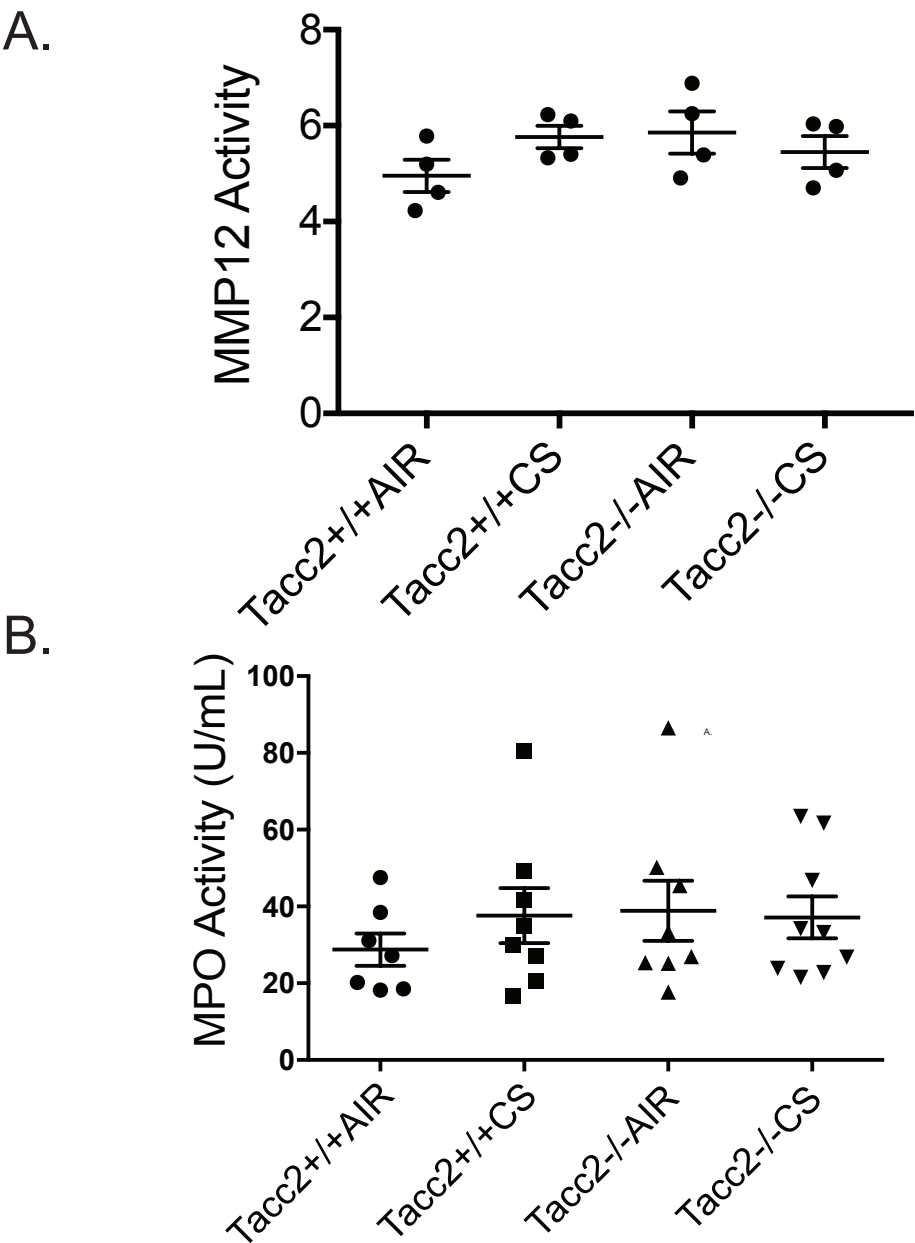

**Supplemental Fig. 2**

**A.** After completing CS or AIR exposure for 6 wks, the lungs of *Tacc2*<sup>+/+</sup> and *-/-* mice were harvested and homogenized in assay buffer. MMP-12 activity was measured based on fluorescence intensity at Ex/Em=490/520 nm. Data are expressed as mean ± SEM.

**B.** Mice were treated as in A. MPO antigen levels in lungs tissues lysates were measured using the ELISA. Data are expressed as mean ± SEM.
